# Supplementary material
Source: PubMed Central journal article supplement (PMC8683262)
Supplement: mmc1.pdf [file mmc1.pdf]

**Supplemental information**

**Discovery of ultrapotent  
broadly neutralizing antibodies  
from SARS-CoV-2 elite neutralizers**

**Kanika Vanshylla, Chengcheng Fan, Marie Wunsch, Nareshkumar Poopalasingam, Matthijs Meijers, Christoph Kreer, Franziska Kleipass, Denis Ruchnewitz, Meryem S. Ercanoglu, Henning Gruell, Friederike Münn, Kai Pohl, Hanna Janicki, Tobias Nolden, Simone Bartl, Saskia C. Stein, Max Augustin, Felix Dewald, Lutz Gieselmann, Philipp Schommers, Thomas F. Schulz, Leif Erik Sander, Manuel Koch, Marta Łuksza, Michael Lässig, Pamela J. Bjorkman, and Florian Klein**

**Figure S1**

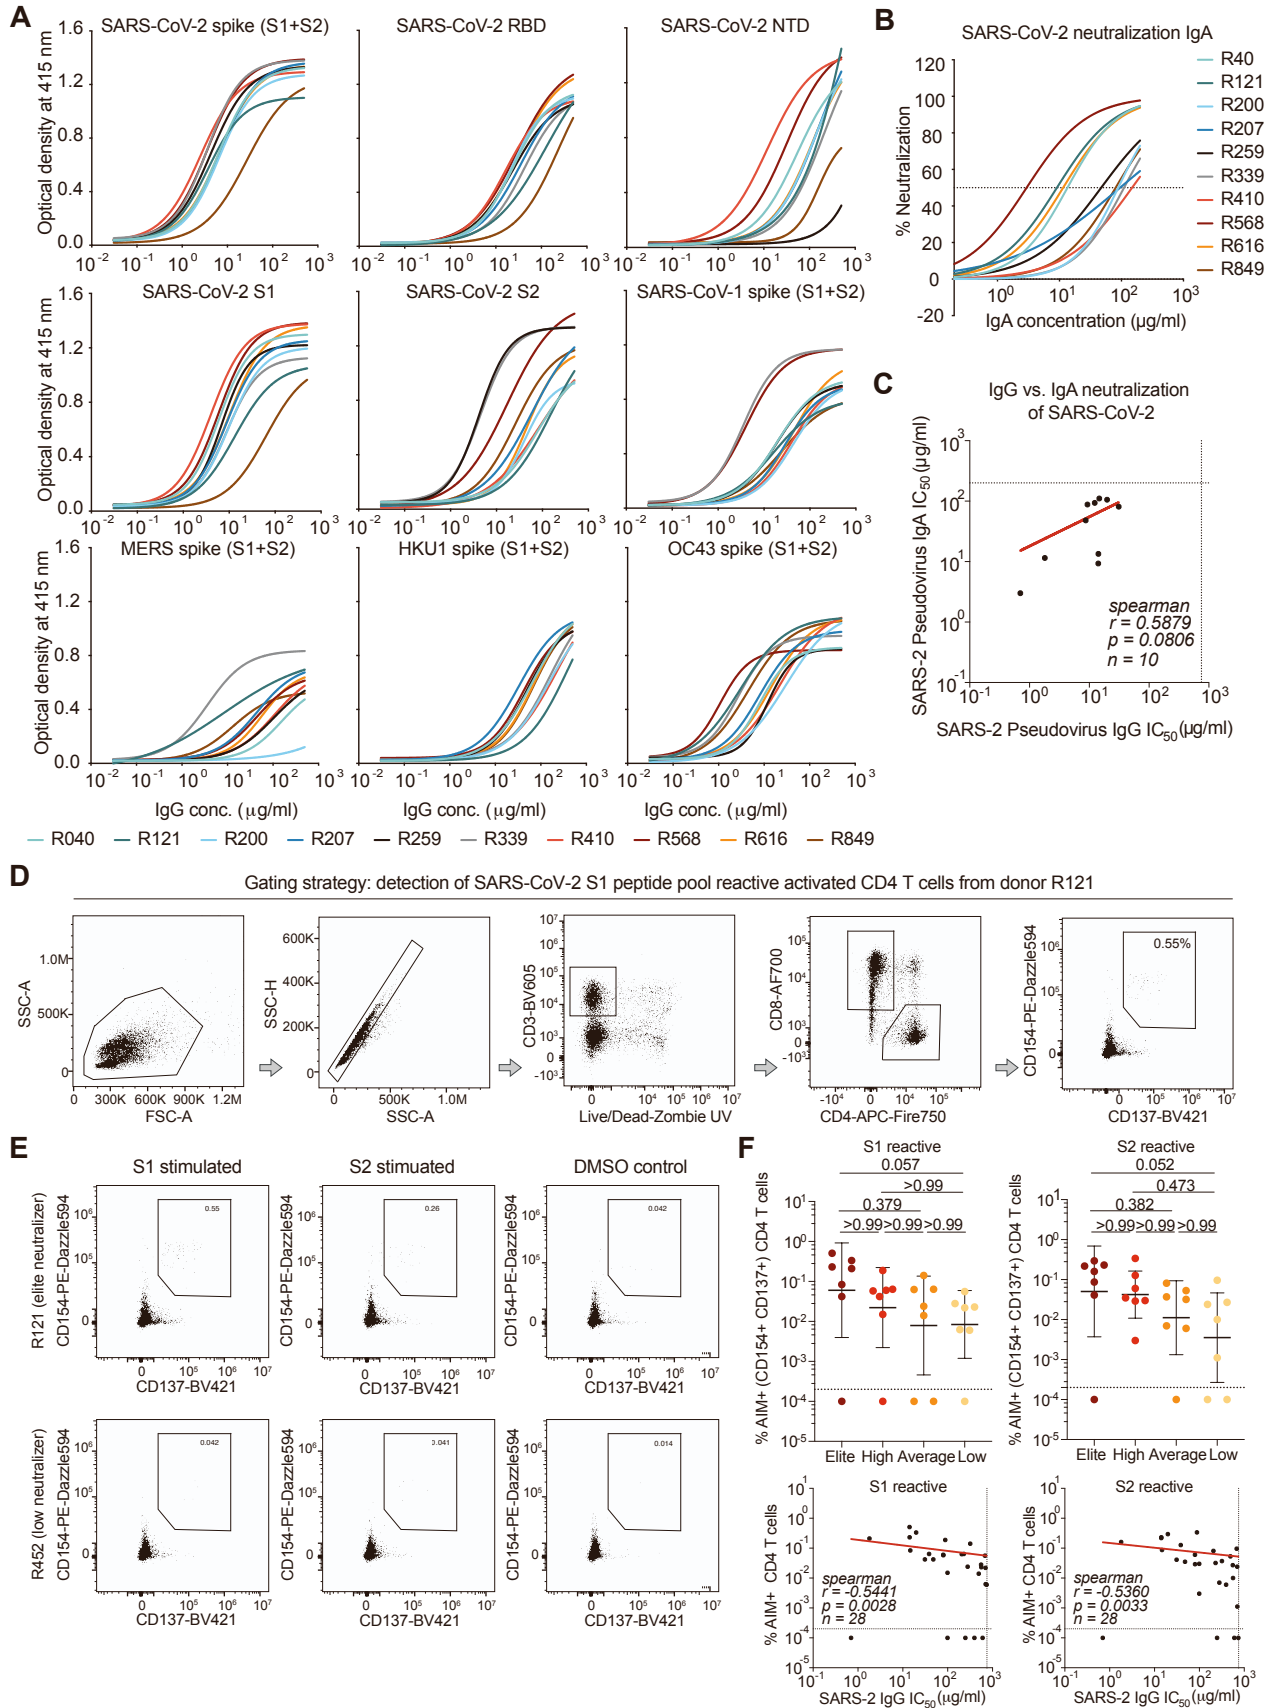

**Figure S1: Coronavirus reactivity of elite neutralizers, related to Figure 1**

**A**, ELISA-based binding curves depicting reactivity of elite neutralizer plasma IgG to SARS-CoV-2 spike trimer, RBD, NTD, S1, S2 as well as SARS-CoV-1 trimer, MERS trimer, HKU-1 spike and OC43 spike proteins. **B**, Neutralization curves depicting IgA neutralization from  $n=10$  donor elite neutralizers against SARS-CoV-2 pseudovirus. Mean of two measurements plotted and dotted line represents 50% neutralization. **C**, Correlation plot between plasma purified IgG and IgA against SARS-CoV2 pseudovirus for 10 analyzed elite neutralizers. Dotted line represent limit of detection of assays; 750  $\mu\text{g/ml}$  for IgG and 200  $\mu\text{g/ml}$  for IgA. **D**, Gating strategy for detection of SARS-CoV-2 peptide pool reactive activated CD4 T cells as measured by presence of CD137+/CD154+ activation induced marker (AIM+) CD4 T cells. **E**, Exemplary plots of AIM+ expression on CD4+ T cells (of one elite- and one low-neutralizer after stimulation with S1 and S2 peptide pools as well as unstimulated control (DMSO)). **F**, upper panel, T cell reactivity against SARS-CoV-2 S1 and S2 peptide pools in elite-, high-, average- and low-neutralizers ( $n=7$  per group) as measured by activation induced marker (AIM+) CD137+/CD154+ CD4 T cells. Bars show geometric mean with 95%CI and statistical testing was done using the Kruskal-Wallis test. Values plotted below the dotted line did not show any detectable reactivity; lower panel, correlation plots between reactive AIM+ CD4 T cells and SARS-CoV-2 pseudovirus neutralization. Dotted lines denote limit of detection ( $\text{IC}_{50}$ ) or values below dotted line did not show detectable reactivity (%AIM+ CD4 T cells).

**Figure S2**

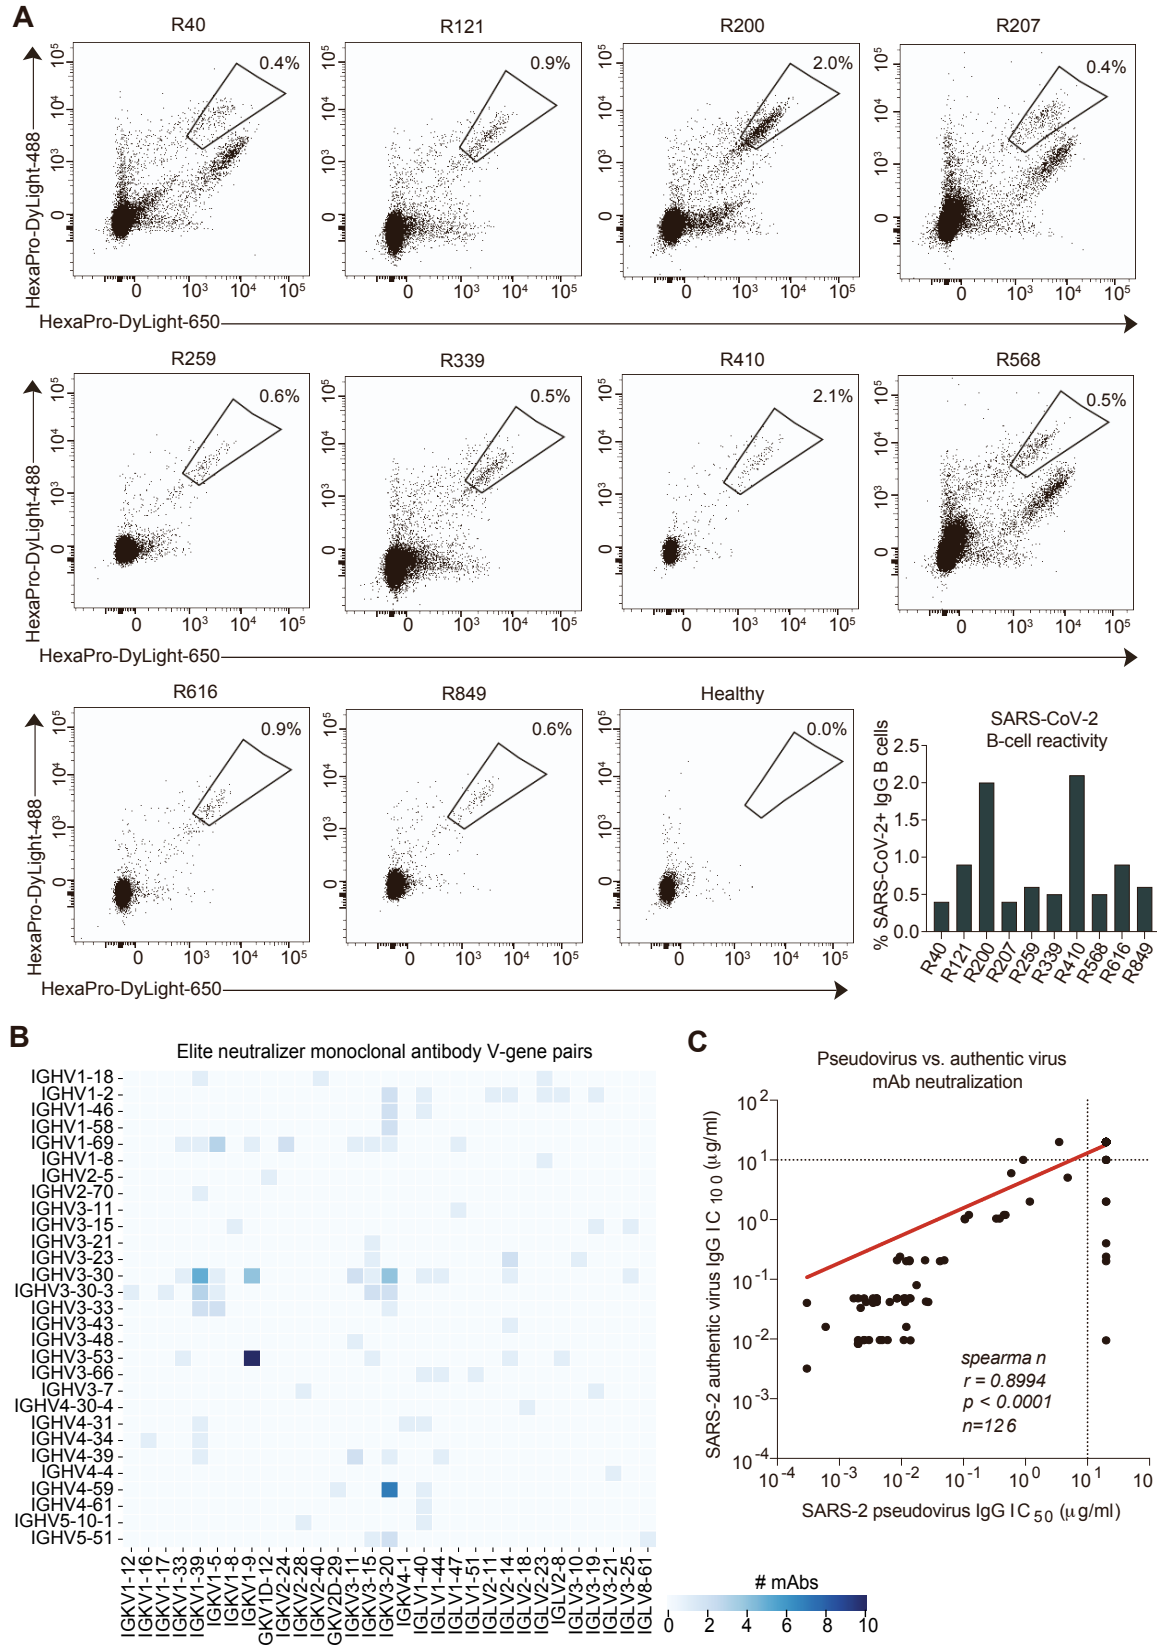

**Figure S2: Fraction of SARS-CoV-2 reactive B cells from elite neutralizers and features of isolated mAbs, related to Figures 2 and 3**

**A**, FACS plots and graph (lower right) showing the SARS-CoV-2 spike-reactive fraction amongst IgG<sup>+</sup> B cells in elite neutralizers. **B**, Heat map illustrating the frequency of heavy and light V-gene combinations of the n=126 elite neutralizer derived mAbs produced and studied in detail. **C**, Correlation plot between SARS-CoV2 pseudovirus and authentic virus neutralization for n=126 tested mAbs. Dotted lines represent limit of detection of assays of 10 µg/ml IgG.

**Figure S3**

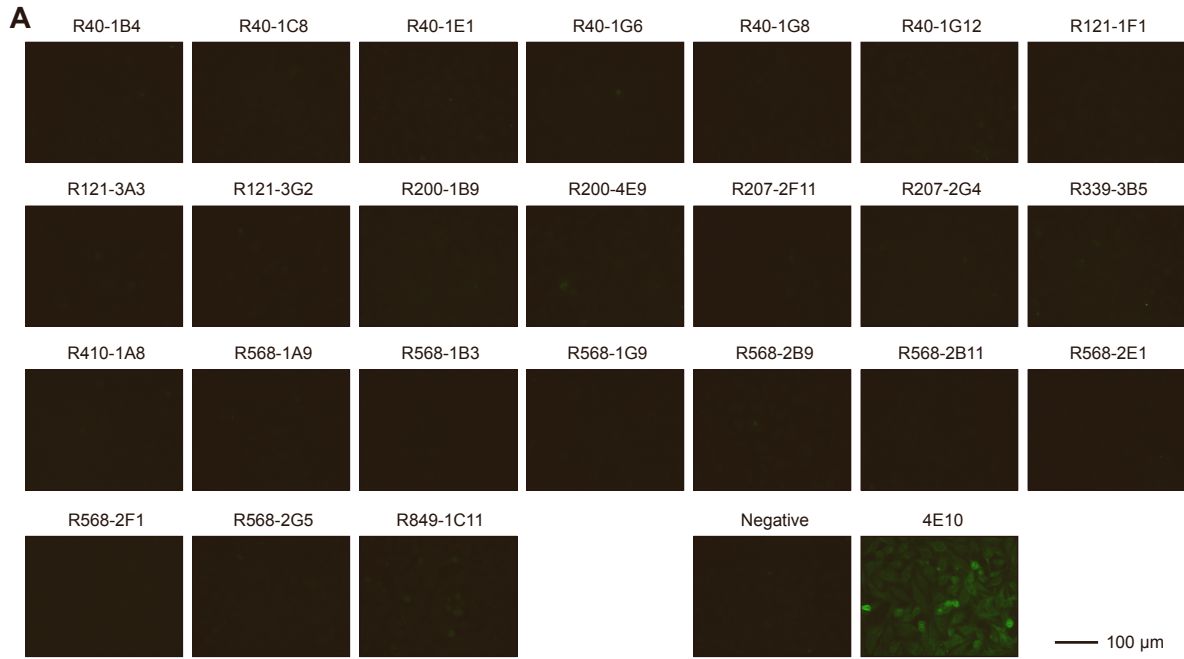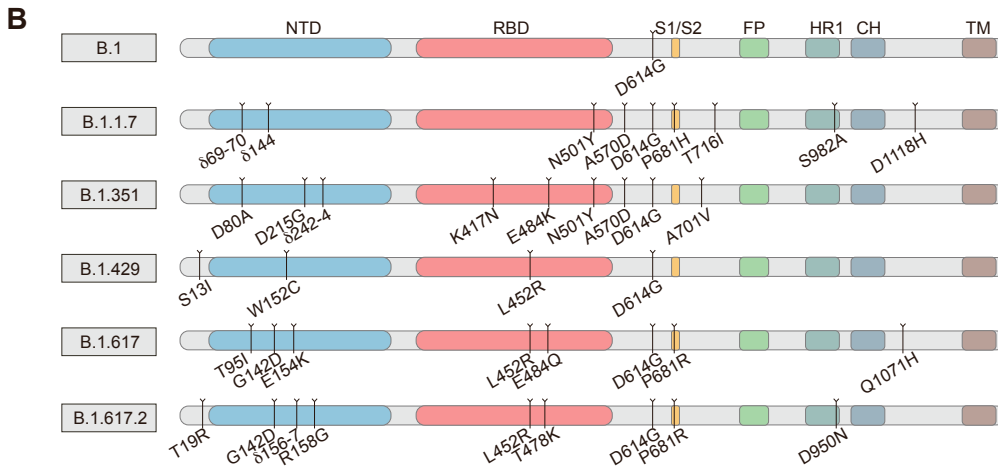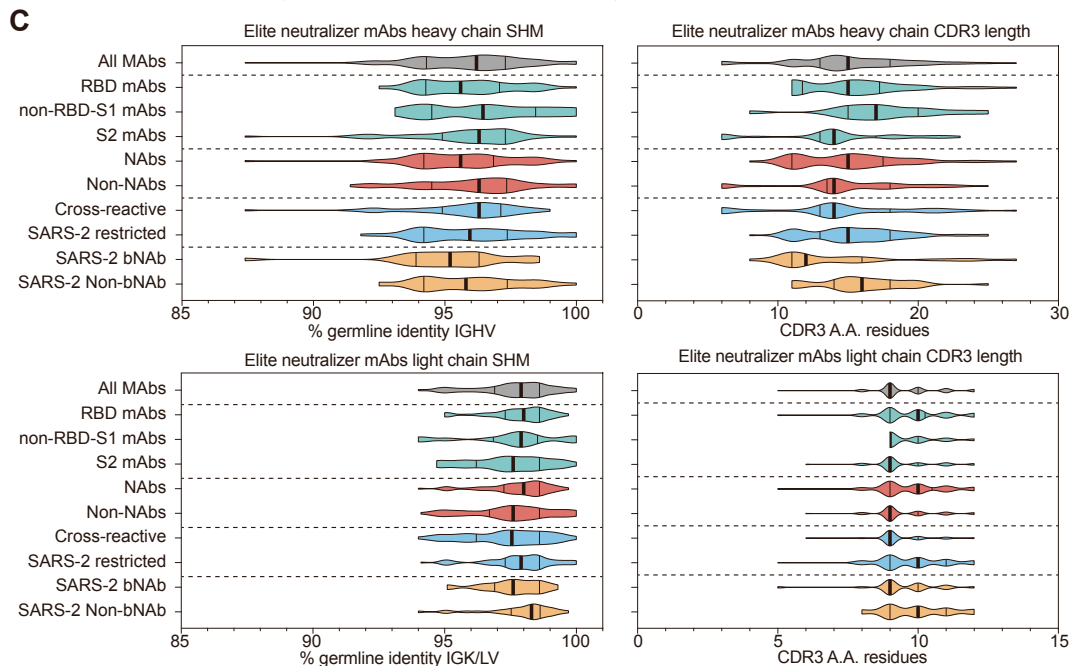

**Figure S3: Exclusion of mAb autoreactivity, SARS-CoV-2 variants and the role of V-gene characteristics on defining breadth and potency of isolated NAb, related to Figures 3 and 4**

**A**, Hep-2 cell assay to screen for autoreactivity of selected mAbs tested at 100  $\mu$ g/ml. **B**, Schematic of the SARS-CoV-2 spike domains highlighting the residues mutated in the VOCs or VOIs used in the study. **C**, Analysis of the role of heavy chain (top panel) and light chain (lower panel) V-gene somatic hypermutation rate (left) and CDR3 length (left) in influencing spike binding patterns or SARS-CoV-2 pseudovirus neutralization potency of the mAbs (n=126).



**Figure S4**

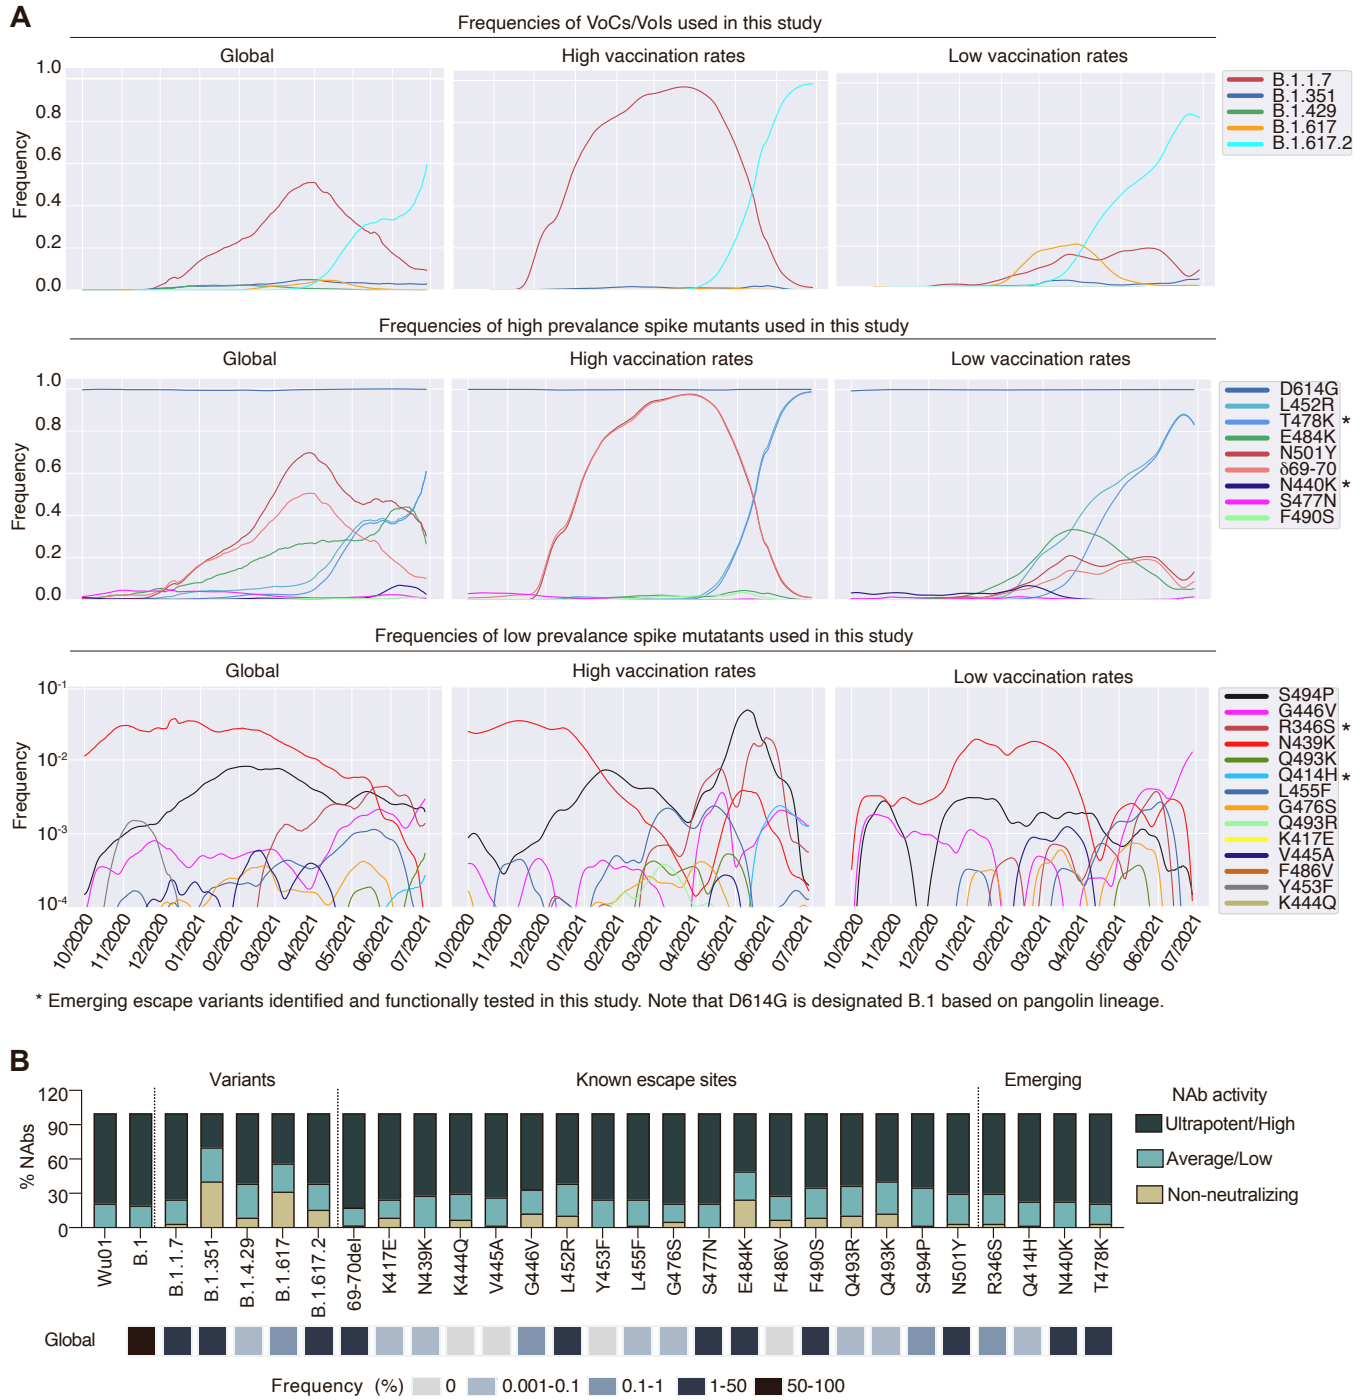

**Figure S4: Frequency of known and emerging escape variants and potency of NAb against them, related to Figure 5**

**A**, Plots show the frequency distribution of the variants and escape sites from sequences downloaded on July 21<sup>st</sup> 2021. Frequencies are corrected for the collection date and total case counts in the region (see Methods). Countries with high vaccination rates (>60%) include UK and Israel. Countries and regions with low vaccination rates (<30%) include South America, Japan, India, Russia, Indonesia, Thailand, Iran Bangladesh, Vietnam, Africa. **B**, Plot depicting fraction of isolated NAb which show ultrapotent/high neutralization ( $IC_{50} < 0.2 \mu\text{g/ml}$ , olive green), average/low neutralization ( $IC_{50} 0.2-10 \mu\text{g/ml}$ , light green) or complete escape ( $IC_{50} > 10 \mu\text{g/ml}$ , golden) against the corresponding pseudovirus variant tested along with the respective global frequencies of respective variants (panel below).

**Figure S5**

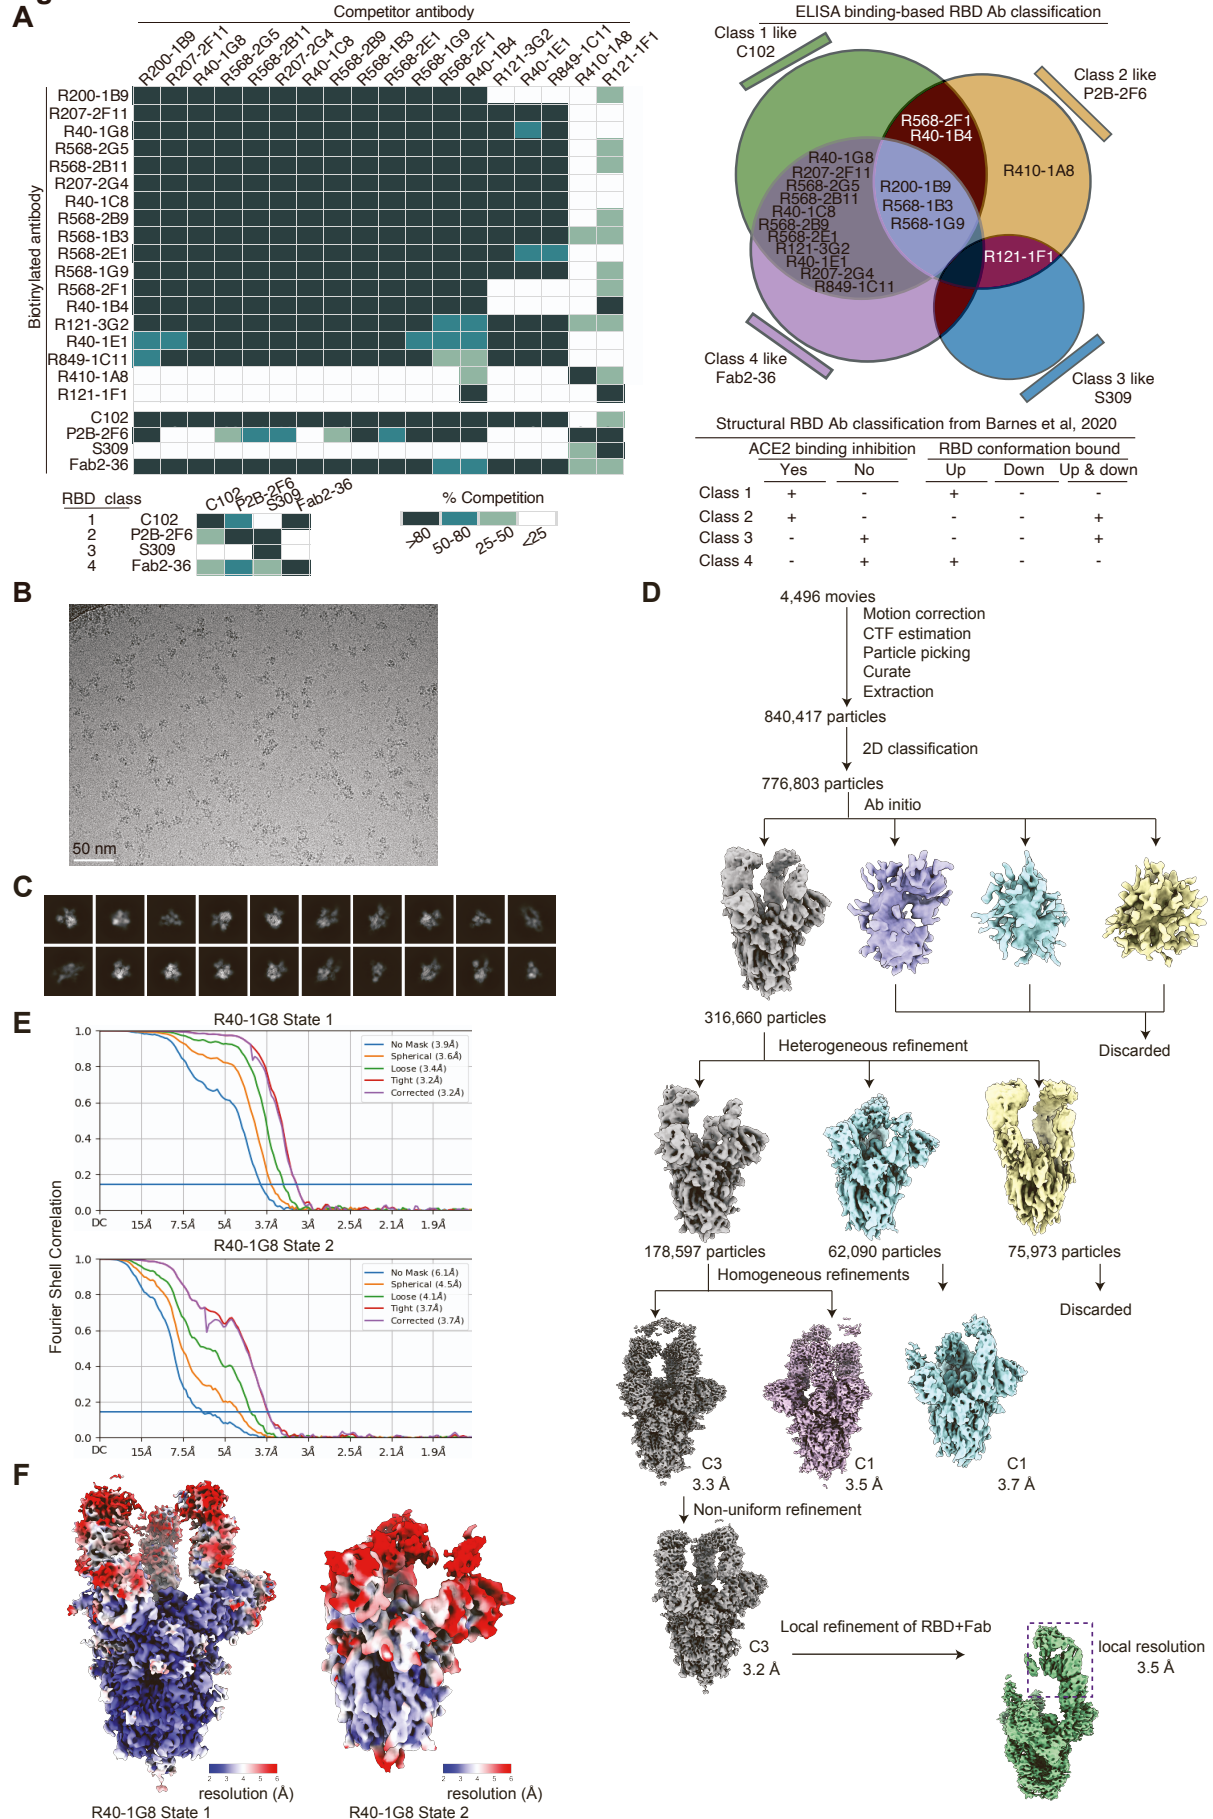

**Figure S5: RBD class-mapping of bNAbs and CryoEM data processing and validation of R40-1G8 in complex with SARS-CoV-2 S protein, related to Figure 6.**

**A**, Competition ELISA-based RBD epitope mapping of 18 RBD bNAbs with 100% breadth along with 1 mAb each from the 4 known RBD-binding epitope classes based on structural mapping. **B**, Representative micrograph (scale bar, 50 nm) **C**, 2D classes **D**, workflow of single-particle data processing **E**, Fourier shell correlation (FSC) plots and **F**, local resolution estimations for R40-1G8 in complex with SARS-CoV-2-S. Two states of R40-1G8-SARS-CoV-2-S complex were resolved, with one state having all 'up' RBDs, and the second state having 1 'up' RBD with R40-1G8 bound, 1 'down' RBD with R40-1G8 bound and 1 flexible 'up' RBD with no antibody binding.

**Figure S6**

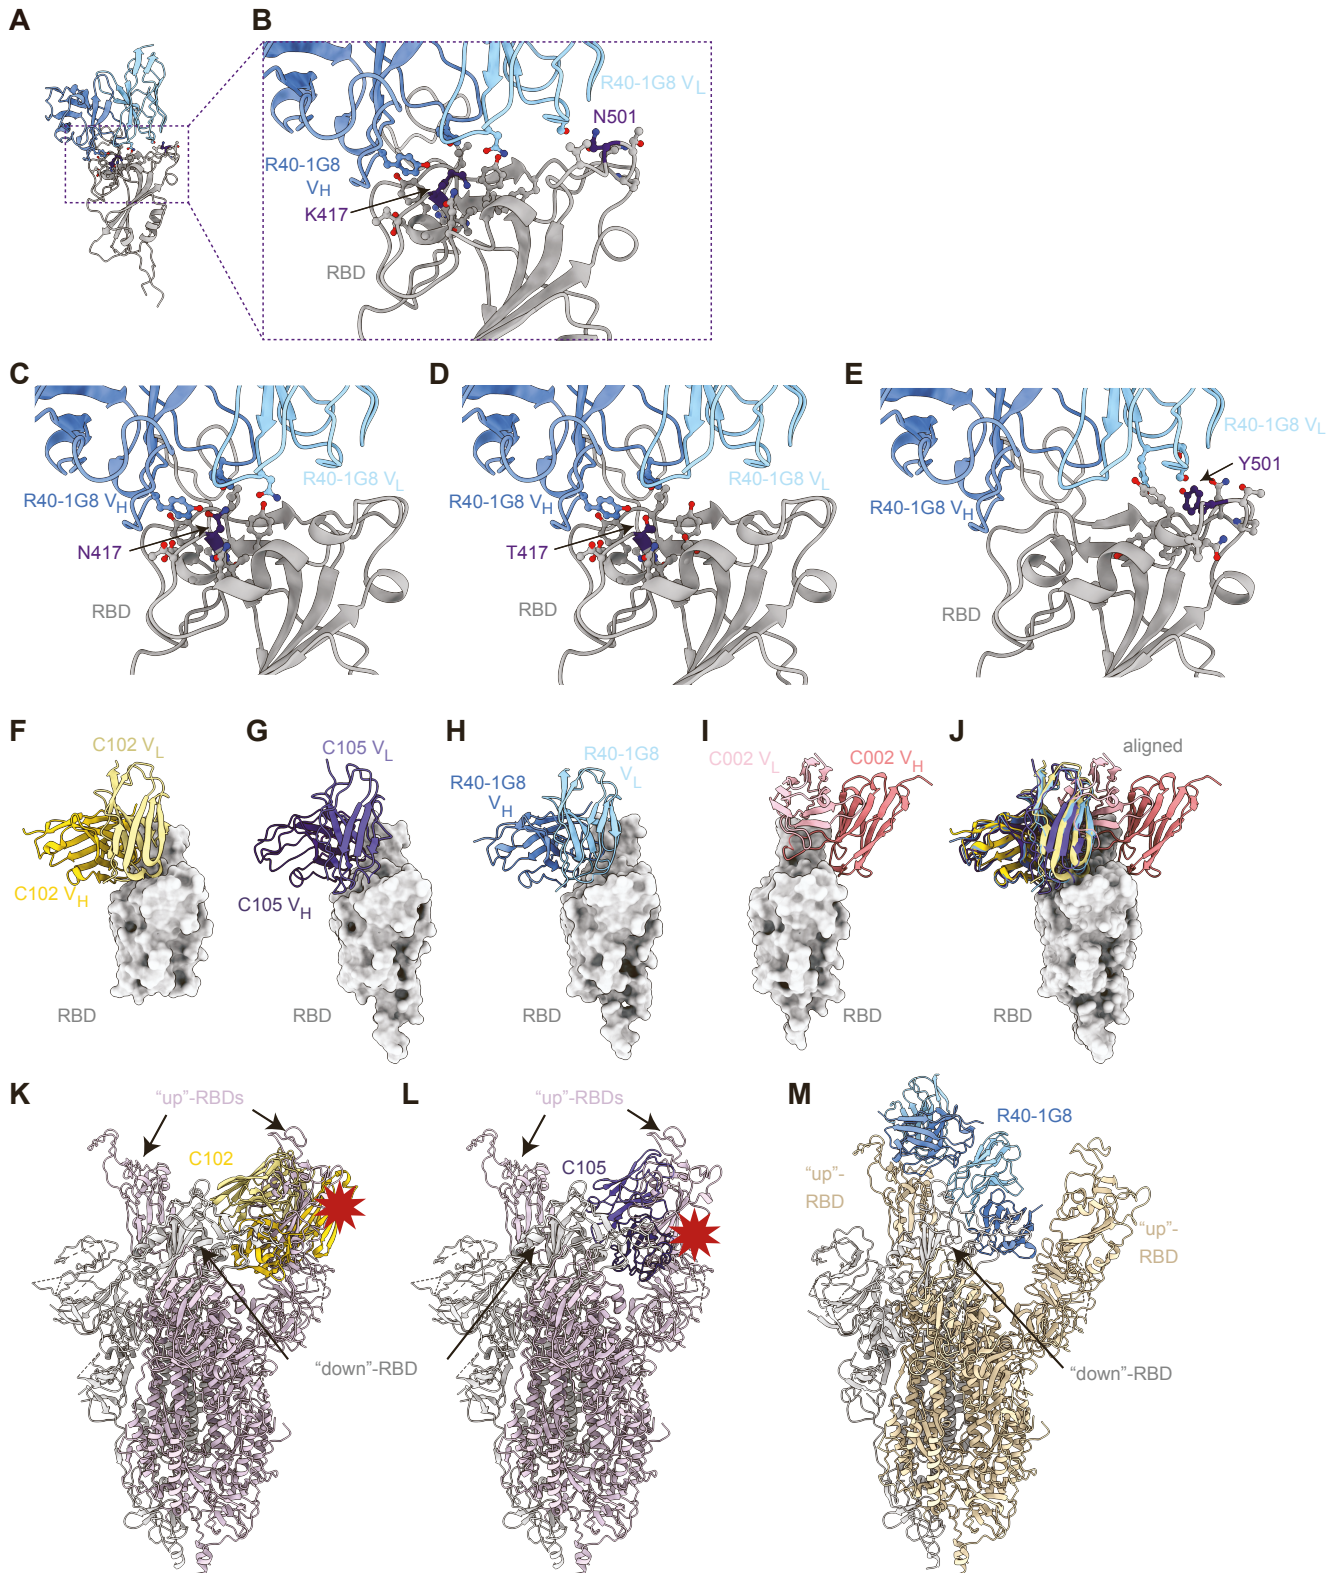

**Figure S6: Predicted interactions of R40-1G8 Fab with two RBD residues that vary in SARS-CoV-2 VOC and structural comparisons of RBD class 1 antibodies, related to figure 6.**

**A**, VH-VL domains of R40-1G8 Fab complexed with RBD. RBD positions K417 and 501 are highlighted in purple with sidechains in ball and stick representation. **B**, Close-up of R40-1G8 interactions with RBD residues near positions 417 and 501, the sites that are substituted in K417N/T and N501Y variants. Close-up views of R40-1G8 interactions with homology models of SARS-CoV-2 RBD including K417N (C), K417T (D), and N501Y (E) substitutions. Homology models were constructed using SWISS-Model, based on a high-resolution crystal structure of SARS-CoV-2 RBD (PDB 7EAM). Models of R40-1G8 Fab in complex with the RBD models were obtained by aligning the RBD portion of the R40-1G8 Fab-SARS-CoV-2 S 6P cryo-EM structure with the RBD homology models. Residues within 5 Å of RBD positions 417 and 501 are shown in ball and stick representation. **F-H**, Structures of the VH-VL domains of class 1 antibodies C102 (F) (PDB 7K8M), C105 (G) (PDB 6XCM), and R40-1G8 (H) (PDB 7SC1), demonstrating similar epitopes and binding poses. **I**, Structure of the VH-VL domains of the class 2 antibody C002 (PDB 7K8T) in complex with SARS-CoV-2 RBDs, demonstrating binding to a different RBD epitope. **J**, Overlay of C102, C105, R40-1G8 and C002 VH-VL domains bound to the SARS-CoV-2 RBD. **K-M**, Structural alignments on a 'down' RBD of an S trimer of the VH-VL domains for C102 (K) (PDB 7K8M) and C105 (L) (PDB 6XCM) showing that these Fabs would clash with a neighboring 'up' RBD, whereas the VH-VL domains of R40-1G8 (M) bound to a down RBD do not clash with neighboring 'up' RBDs.

**Table S1: Demographics and the antibody response in study participants, related to Figure 1**

**A**

| Study ID | Age (years) | Gender | COVID-19 severity | Disease symptoms* | Pre-existing conditions** |
|----------|-------------|--------|-------------------|-------------------|---------------------------|
| R40      | 55          | Male   | Mild disease      | 1,2,3,5,6,7,8     | None reported             |
| R121     | 45          | Male   | Mild disease      | 1,2               | None reported             |
| R200     | 32          | Female | Mild disease      | 1,4,7,8,9         | None reported             |
| R207     | 50          | Female | Mild disease      | 1,2,3,4,5,6,7,8,9 | None reported             |
| R259     | 54          | Female | Mild disease      | 2,8,9             | None reported             |
| R339     | 57          | Male   | Hospitalized      | 1,2,4,5,8,9       | Heart attack              |
| R410     | 55          | Male   | Mild disease      | 2,5,6,8,9         | None reported             |
| R568     | 60          | Female | Hospitalized      | 1,3,5,7,8         | Hypertension              |
| R616     | 41          | Male   | Mild disease      | 1,5,6,8,9         | Thrombocytopenia          |
| R849     | 47          | Female | Mild disease      | 1,2,3,4,6,8,9     | Asthma                    |

\* 1 = Fever, 2= Cough, 3= Sore throat, 4= Rhinitis, 5= Muscle and body ache, 6= Headache, 7= Diarrhea, 8= Change in taste , 9 = Change in olfaction  
 \*\* Conditions that are risk factors for COVID-19

**B**

| Study ID | Weeks since disease onset | Neutralization IC <sub>50</sub> (µg/ml) |        |        | ELISA Area under curve   EC50 in µg/ml |      |        |       |        |        |        |        |        |       |      |      |     |       |     |       |     |      |
|----------|---------------------------|-----------------------------------------|--------|--------|----------------------------------------|------|--------|-------|--------|--------|--------|--------|--------|-------|------|------|-----|-------|-----|-------|-----|------|
|          |                           | IgG                                     |        | IgA    | SARS-2                                 |      | SARS-2 |       | SARS-2 |        | SARS-1 |        | MERS   | HKU1  | OC43 |      |     |       |     |       |     |      |
|          |                           | SARS-2                                  | SARS-1 | SARS-2 | Trimer                                 | RBD  | NTD    | S1    | S2     | Trimer | Trimer | Trimer | Trimer |       |      |      |     |       |     |       |     |      |
| R40      | 4.1                       | 14.2                                    | 22.4   | 13.4   | 576                                    | 6.4  | 437    | 24.8  | 427    | 53.8   | 576    | 6.0    | 309    | 78.2  | 360  | 19.8 | 113 | 154.5 | 350 | 65.5  | 363 | 8.0  |
| R121     | 4.6                       | 14.1                                    | 47.9   | 9.3    | 478                                    | 3.7  | 344    | 125.4 | 403    | 103.1  | 425    | 13.3   | 311    | 151.9 | 291  | 16.3 | 255 | 8.4   | 193 | 403.9 | 463 | 2.9  |
| R200     | 6.4                       | 9.3                                     | 391.7  | 87.8   | 546                                    | 6.6  | 436    | 21.6  | 386    | 126.9  | 510    | 9.9    | 340    | 40.2  | 303  | 44.7 | 0   | >500  | 260 | 147.5 | 384 | 29.2 |
| R207     | 5.0                       | 12.3                                    | 55.0   | 93.6   | 585                                    | 7.1  | 411    | 35.6  | 396    | 166.5  | 539    | 8.8    | 422    | 58.0  | 325  | 28.8 | 226 | 44.1  | 391 | 32.8  | 408 | 8.0  |
| R259     | 5.4                       | 8.7                                     | 61.8   | 48.0   | 585                                    | 4.3  | 405    | 23.4  | 38     | >500   | 539    | 6.9    | 599    | 4.2   | 350  | 18.6 | 149 | 104.5 | 344 | 48.9  | 349 | 11.9 |
| R339     | 6.1                       | 14.7                                    | 40.4   | 110.5  | 615                                    | 3.6  | 382    | 43.1  | 331    | 204.9  | 474    | 8.8    | 595    | 4.5   | 517  | 3.5  | 357 | 3.6   | 280 | 161.1 | 417 | 2.7  |
| R410     | 6.1                       | 19.8                                    | 33.7   | 105.5  | 577                                    | 2.5  | 433    | 16.4  | 568    | 12.1   | 618    | 4.0    | 313    | 84.2  | 317  | 40.0 | 160 | 109.7 | 257 | 241.0 | 420 | 22.4 |
| R568     | 8.6                       | 0.7                                     | 12.1   | 3.0    | 618                                    | 3.6  | 487    | 29.1  | 533    | 32.0   | 615    | 5.8    | 587    | 17.1  | 511  | 4.0  | 202 | 44.4  | 353 | 41.9  | 359 | 1.1  |
| R616     | 7.7                       | 1.8                                     | 33.1   | 11.5   | 577                                    | 6.6  | 473    | 31.0  | 385    | 115.6  | 583    | 10.0   | 406    | 46.7  | 362  | 43.3 | 202 | 58.4  | 345 | 70.3  | 429 | 14.0 |
| R849     | 9.6                       | 31.0                                    | 5.1    | 80.9   | 450                                    | 27.0 | 263    | 235.5 | 178    | 156.3  | 326    | 64.4   | 455    | 26.0  | 279  | 25.1 | 184 | 13.3  | 339 | 69.2  | 454 | 4.4  |

**C**

| Study ID | Age (years) | Gender | Disease severity | Neutralization group | IgG IC50 ( mg/ml) SARS-2 |
|----------|-------------|--------|------------------|----------------------|--------------------------|
| R102     | 54          | Male   | Mild symptoms    | High                 | 99.3                     |
| R301     | 56          | Fem    | Mild symptoms    | High                 | 99.2                     |
| R501     | 45          | Male   | Mild symptoms    | High                 | 80.0                     |
| R561     | 44          | Male   | Mild symptoms    | High                 | 38.4                     |
| R702     | 43          | Fem    | Hospitalized     | High                 | 79.7                     |
| R759     | 52          | Male   | Mild symptoms    | High                 | 47.9                     |
| R851     | 53          | Male   | Mild symptoms    | High                 | 88.3                     |
| R10      | 54          | Male   | Asymptomatic     | Average              | 206.0                    |
| R649     | 56          | Fem    | Mild symptoms    | Average              | 318.8                    |
| R674     | 50          | Fem    | Mild symptoms    | Average              | 248.1                    |
| R675     | 32          | Male   | Mild symptoms    | Average              | 278.9                    |
| R679     | 47          | Male   | Mild symptoms    | Average              | 229.2                    |
| R709     | 47          | Male   | Mild symptoms    | Average              | 394.4                    |
| R803     | 29          | Male   | Mild symptoms    | Average              | 493.0                    |
| R369     | 31          | Fem    | Mild symptoms    | Low                  | 703.9                    |
| R452     | 39          | Male   | Mild symptoms    | Low                  | 555.6                    |
| R456     | 36          | Male   | Mild symptoms    | Low                  | 696.8                    |
| R457     | 25          | Fem    | Mild symptoms    | Low                  | 679.4                    |
| R680     | 54          | Fem    | Mild symptoms    | Low                  | 740.0                    |
| R753     | 59          | Fem    | Mild symptoms    | Low                  | 562.8                    |
| R807     | 45          | Male   | Mild symptoms    | Low                  | 601.9                    |

\* T cell response compared to elite neutralizers R40, R121, R339, R410, R568, R616, R849

**Table S2: Features of IGHV3-53 NAbS from SARS-CoV-2 elite neutralizers, related to Figure 4**

| Antibody  | IGHV     | CDRH3<br>a.a. length | CDRH3 Sequence  | % Breadth | K417E<br>escape | E484K<br>escape | IGKV     | Average**<br>IC50 ( μg/ml) |
|-----------|----------|----------------------|-----------------|-----------|-----------------|-----------------|----------|----------------------------|
| R207-2F11 | IGHV3-53 | 11                   | ARDLVYRGMDV     | 100       | No              | No              | IGKV1-33 | 0.0043                     |
| R40-1G8   | IGHV3-53 | 11                   | ARDLYVFGMDV     | 100       | No              | No              | IGKV1-9  | 0.0047                     |
| R568-2G5  | IGHV3-53 | 11                   | ARDLYYYGMDV     | 100       | No              | No              | IGKV1-9  | 0.0055                     |
| R568-2B11 | IGHV3-53 | 11                   | TRDLVYYGMDV     | 100       | No              | No              | IGKV1-9  | 0.0072                     |
| R207-2G4  | IGHV3-53 | 11                   | ARDLVAYGMDV     | 100       | No              | No              | IGKV1-9  | 0.0078                     |
| R40-1C8   | IGHV3-53 | 11                   | VRDLVDYGMDV     | 100       | No              | No              | IGKV1-9  | 0.0097                     |
| R568-2B9  | IGHV3-53 | 11                   | ARDLVHYGMDV     | 100       | No              | No              | IGKV1-9  | 0.0102                     |
| R568-1B3  | IGHV3-53 | 11                   | ARDLVAYGMDV     | 100       | No              | No              | IGKV1-9  | 0.0115                     |
| R568-2E1  | IGHV3-53 | 11                   | ARDLIVYGMDV     | 100       | No              | No              | IGKV1-9  | 0.0200                     |
| R207-2A6  | IGHV3-53 | 11                   | ARDYGDYYFDY     | 96        | Yes             | No              | IGKV3-15 | 0.0329                     |
| R207-2C2  | IGHV3-53 | 12                   | ARGEGWDLPFDY    | 91        | Yes             | No              | IGLV2-8  | 0.0096                     |
| R207-1C4  | IGHV3-53 | 11                   | ARDRYVLGMDV     | 91        | Partial*        | No              | IGKV1-9  | 1.1306                     |
| R568-1E8  | IGHV3-53 | 11                   | ARDLDYYGMDV     | 83        | Yes             | No              | IGKV1-9  | 0.1571                     |
| R616-1G4  | IGHV3-53 | 15                   | ARDKRIPYYFYGMDV | 70        | No              | Partial*        | IGLV2-14 | 1.0849                     |
| C102      | IGHV3-53 | 11                   | ARDYGDYYFDY     | 91        | Yes             | No              | IGKV3-20 | 0.1146                     |

\* Partial escape when fold change in IC<sub>50</sub> of greater than 10-fold observed

\*\* Average IC<sub>50</sub> based on neutralization profile against variants tested in Figure 4



**Table S3: Cryo-EM data collection, refinement and validation statistics, related to Figure 6**

|                                          | SARS-CoV-2 S 6P + R40-1G8 Fab |
|------------------------------------------|-------------------------------|
| <b>Data Collection and processing</b>    |                               |
| Microscope                               | Titan Krios at Caltech        |
| Camera                                   | Gatan K3                      |
| Magnification                            | x105,000                      |
| Voltage (keV)                            | 300                           |
| Exposure (e/Å <sup>2</sup> )             | 60                            |
| Pixel size (Å)                           | 0.832                         |
| Defocus Range (μm)                       | - 1.0 to -3.0                 |
| Initial Particle Image (no.)             | 841,017                       |
| Final Particle Image (no.)               | 178,957                       |
| Symmetry Imposed                         | C3                            |
| Map Resolution (Å)                       | 3.17                          |
| FSC Threshold                            | 0.143                         |
| Map Resolution Range (Å)                 | 3.1 - 3.4                     |
| <b>Refinement</b>                        |                               |
| Initial Model Used                       | PDB ID: 7K8T                  |
| Model Resolution (Å)                     | 3.40                          |
| FSC Threshold                            | 0.143                         |
| <b>Model composition</b>                 |                               |
| non-hydrogen atoms                       | 29,415                        |
| protein residues                         | 3,705                         |
| ligands                                  | 45                            |
| <b>Average B-factors (Å<sup>2</sup>)</b> |                               |
| protein                                  | 142                           |
| ligands                                  | 135                           |
| <b>R.m.s. deviations</b>                 |                               |
| Bond length (Å)                          | 0.006                         |
| Bond angles (°)                          | 0.604                         |
| <b>Validation</b>                        |                               |
| MolProbity score                         | 1.79                          |
| Clashscore                               | 10.0                          |
| Rotamer outliers                         | 0.06                          |
| <b>Ramachandran plot</b>                 |                               |
| Ramachandran favored (%)                 | 96.02                         |
| Ramachandran allowed (%)                 | 3.98                          |
| Ramachandran outliers (%)                | 0                             |
| <b>PDB ID</b>                            | 7SC1                          |
